# Supplementary material for: Characterizing the fluid–matrix affinity in an organogel from the growth dynamics of oil stains on blotting paper
Source: Royal Society of Chemistry journal article supplement (doi:10.1039/c9sm01965k), 2020-01-01
Supplement: c9sm01965k1.pdf [file c9sm01965k1.pdf]

## List of symbols

### Latin

|            |             |                                                                  |
|------------|-------------|------------------------------------------------------------------|
| $A$        | $m^2$       | Area                                                             |
| $a$        | $m$         | Base radius of the grease patch                                  |
| $b$        | $m$         | Thickness of the paper                                           |
| $C, C^*$   | $m^{-1}$    | Specific wetting area, wetting area per unit oil volume          |
| $c$        | –           | power law constant, related to $\beta$                           |
| $c_*$      | $kg/m^2$    | Reference mass concentration of oil                              |
| $H$        | $m$         | Height of oil front in the grease matrix                         |
| $h$        | $m$         | Height of oil front during capillary rise                        |
| $I$        | –           | Intensity                                                        |
| $i, j$     | –           | Indexes of an image pixel                                        |
| $k$        | $m^2$       | Permeability                                                     |
| $m_s$      | $kg$        | Mass of oil when all pores are saturated                         |
| $m_{tot}$  | $kg$        | Total mass of oil available in drop or patch                     |
| $m_0$      | $kg$        | $\rho\phi_p b\pi a^2$                                            |
| $n(s)ds$   | $m^{-3}$    | Number density of pores with a radius between $s$ and $s + ds$ ; |
| $n_t$      | $m^{-3}$    | Total number density of pores                                    |
| $p$        | $Pa$        | Pressure                                                         |
| $q, q_0$   | $m^{-1}$    | Attenuation coefficients                                         |
| $R$        | $m$         | Effective stain radius                                           |
| $R_{fr}$   | $m$         | Radius of the edge of the stain                                  |
| $r, z$     | $m$         | Radial, axial coordinates                                        |
| $S$        | –           | Integrated intensity contrast                                    |
| $S_\infty$ | –           | Integrated intensity contrast after full absorption              |
| $s$        | $m$         | Pore radius                                                      |
| $t$        | $s$         | Time                                                             |
| $t_s, t_r$ | $s$         | Characteristic spreading, capillary rising time                  |
| $v$        | $m/s$       | Velocity                                                         |
| $w$        | $m/s^{1/2}$ | Constant                                                         |

### **Greek**

|                        |               |                                                                      |
|------------------------|---------------|----------------------------------------------------------------------|
| $\alpha(s)$            | -             | Fraction of filled pores with a radius between $s$ and $s + ds$      |
| $\beta$                | -             | Power law constant                                                   |
| $\gamma$               | $N/m$         | Interfacial tension                                                  |
| $\Delta p$             | $Pa$          | Capillary pressure                                                   |
| $\Delta P$             | $Pa$          | $\Delta p_p - \Delta p_g$ Capillary pressure difference              |
| $\lambda_1, \lambda_2$ | $m^{2-\beta}$ | Attenuation coefficients                                             |
| $\mu$                  | $Pa s$        | Viscosity                                                            |
| $\xi$                  | -             | $(R/a)^2 = m/m_0$ , dimensionless radius squared, dimensionless mass |
| $\rho$                 | $kg/m^3$      | Density                                                              |
| $\tau$                 | -             | Dimensionless time                                                   |
| $\phi, \phi_*$         | -             | Porosity, volume fraction, reference volume fraction                 |

### **Subscript**

|          |                         |
|----------|-------------------------|
| $bg$     | background              |
| $g$      | Grease                  |
| $p$      | Paper                   |
| $px$     | Pixel                   |
| $r, z$   | Radial, axial direction |
| $0$      | Initial value           |
| $\infty$ | Ambient, final value    |
